# Supplementary material for: Nickel nanoparticles oriented on carbon materials as an efficient electrocatalyst for the hydrogen evolution reaction
Source: Royal Society of Chemistry journal article supplement (doi:10.1039/d5cp03883a), 2025-12-22
Supplement: d5cp03883a1.pdf [file d5cp03883a1.pdf]

## Supporting Information

### **Nickel nanoparticles oriented on carbon materials as an efficient electrocatalysts for hydrogen evolution reaction**

Heng Ke<sup>a\*</sup>, Jixiang Zhang<sup>a</sup>, Wenqi Luo<sup>a</sup>, Junshan Ding<sup>a</sup>, Liangzhe Chen<sup>a</sup>, Wentao Tang<sup>a</sup>, Youbing Zhang<sup>a</sup>, Jing Ding<sup>b</sup>, Jun Wang<sup>a\*</sup>, Hong Wang<sup>a\*</sup>.

<sup>a</sup>New Energy Materials and Devices Research Team

College of New Energy

Jingchu University of Technology

<sup>b</sup>Hubei Key Laboratory of Energy Storage and Power Battery EVE Energy Co., Ltd, Jingmen, Hubei, 448124, China

\*Corresponding author: khjuct@126.com; 30578519@qq.com; 1808863169@qq.com.

Electrochemical measurements were tested by the CHI760 chemical workstation at room temperature in a convention three-electrode system with 1.0 M KOH (pH=14) solution. Saturated calomel, carbon and glassy carbon (GC) dropped with catalyst as reference, counter electrodes and working electrode, respectively. The measured potentials with no iR correction and transformed to the reversible hydrogen potential (RHE) according to this formula:  $E_{(RHE)} = E_{(SCE)} + 0.0592 \times \text{pH} + 0.242 \text{ V}$ . Typically, 20 mg catalyst and 1.0 mg Ketjenblack were dispersed in ethanol-DMF (1 mL) solution of 7:3 volume ratio with 20  $\mu\text{L}$  Nafion by ultrasonication for 30 min. Then, 10  $\mu\text{L}$  dispersion solution was spread on the GC electrode surface dried at room temperature. The HER performance were measured at the scanning window form -0.9 V to -1.5 V with the scanning speed of 2  $\text{mV s}^{-1}$  under 1.0 M KOH electrolyte. Cyclic voltammetry (CV) was recorded with the scanning speeds of 20, 40, 60, 80, and 100  $\text{mVs}^{-1}$  in non-Faradaic region from -0.40 V to -0.50 V. Electrochemical impedance spectroscopy (EIS) were tested at the frequency area from 1-10<sup>5</sup> Hz under the bias potential of -1.2V. The electrocatalytic stability was measured by i-t test and continuous cyclic voltammograms test.

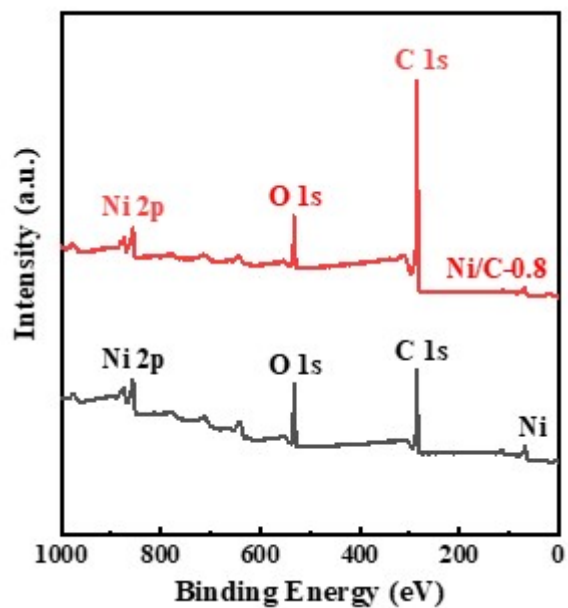

**Figure S1.** XPS survey spectra of Ni and Ni/C-0.8 samples.

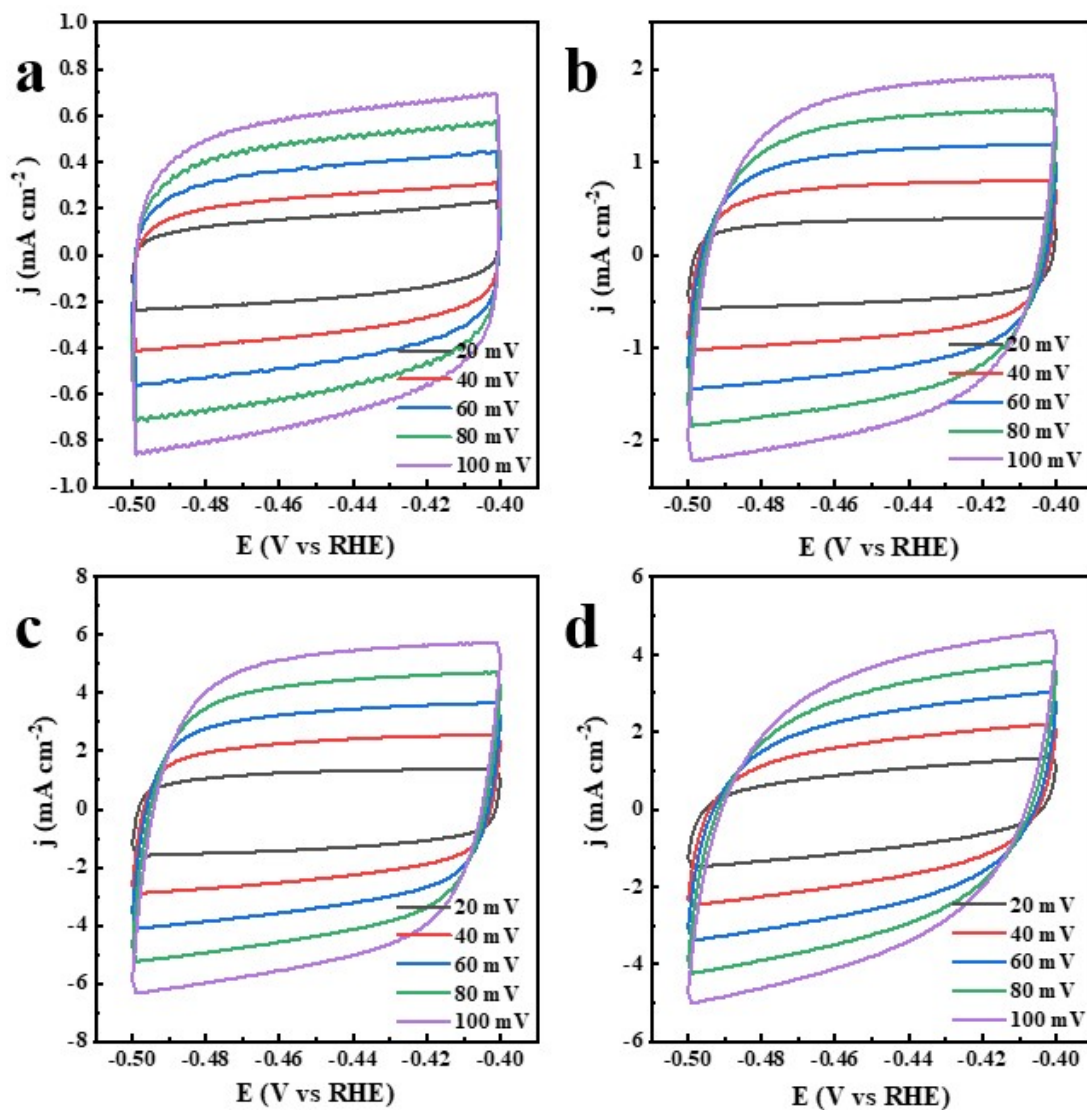

**Figure S2.** CV curves at different scan rates of (a) Ni. (b) Ni/C-0.6. (c) Ni/C-0.8. (d) Ni/C-1.

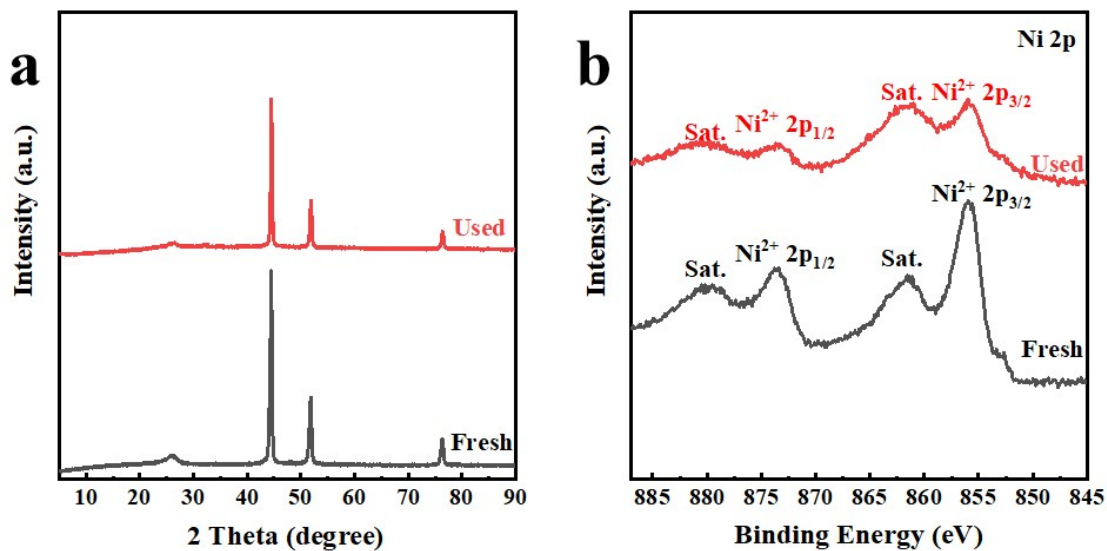

**Figure S3.** (a) XRD patterns of the Ni/C-0.8 samples before and after the stability test. (b) Ni 2p XPS spectra of the Ni/C-0.8 samples before and after the stability test.

**Table 1.** Compare electrocatalytic HER performance with other Ni-based electrocatalyst.

| Catalysts                                            | Substrate | Electrolyte                          | <sup>a</sup> $\eta_{10}$ (mV) | <sup>b</sup> $\eta_{100}$ (mV) | Reference        |
|------------------------------------------------------|-----------|--------------------------------------|-------------------------------|--------------------------------|------------------|
| Ni@B-C                                               | GC        | 1 M KOH                              | 176                           | -                              | [1]              |
| Ni@NC-800                                            | GC        | 1 M KOH                              | 205                           | 305                            | [2]              |
| Ni@CNTs-650                                          | GC        | 1 M KOH                              | 266                           | -                              | [3]              |
| Fe-B@Ni-0.49                                         | GC        | 1 M KOH                              | 202                           | 379                            | [4]              |
| Ni-MoO <sub>2</sub> @BC                              | GC        | 1 M KOH                              | 204                           | -                              | [5]              |
| Ni/C-2                                               | GC        | 1 M KOH                              | 94                            | -                              | [6]              |
| Ni/NC-0.35                                           | GC        | 1 M KOH                              | 133                           | 270                            | [7]              |
| Ni <sub>2</sub> P/CNT                                | GC        | 0.5 M H <sub>2</sub> SO <sub>4</sub> | 124                           | -                              | [8]              |
| (LaPO <sub>4</sub> ) <sub>m</sub> /Ni <sub>2</sub> P | GC        | 1 M KOH                              | 191                           | -                              | [9]              |
| Co-30Ni-B                                            | GC        | 1 M KOH                              | 133                           | 233                            | [10]             |
| <b>Ni/C-0.8</b>                                      | <b>GC</b> | <b>1 M KOH</b>                       | <b>132</b>                    | <b>301</b>                     | <b>This Work</b> |

<sup>a</sup>Overpotential in electrocatalytic HER at -10 mA cm<sup>-2</sup>. <sup>b</sup>Overpotential in electrocatalytic HER at -100 mA cm<sup>-2</sup>.

## References

- (1) Yusuf, B.-A.; Xu, Y.-G.; Ullah, N.; Xie, M.; Oluigbo, C.-J.; Yaseen, W.; Alagarasan, J.-K.; Rajalakshmi, K.; Xie, J.-M. B-doped carbon enclosed Ni nanoparticles: A robust, stable and efficient electrocatalyst for hydrogen evolution reaction. *Journal of Electroanalytical Chemistry*. **2020**, *869*, 114085.
- (2) Xu, Y.; Tu, W.-G.; Zhang, B.-W.; Yin, S.-M.; Huang, Y.-Z.; Kraft, M.; Xu, R. Nickel nanoparticles encapsulated in few-layer nitrogen doped graphene derived from metal-organic frameworks as efficient bifunctional electrocatalysts for overall water splitting. *Advanced Materials*. **2017**, *29*(11), 1605957.
- (3) Oluigbo, C.-J.; Xie, M.; Ullah, N.; Yang, S.-S.; Zhao, W.-T.; Zhang, M.-M.; Lv, X.-M.; Xu, Y.-G.; Xie, J.-M. Novel one-step synthesis of nickel encapsulated carbon nanotubes as efficient electrocatalyst for hydrogen evolution reaction. *International Journal of Hydrogen Energy*. **2019**, *44*(5), 2685-2693.
- (4) Li, Y.-X.; Yang, T.-Y.; Li, H.; Tong, R.-J.; Peng, S.-Q.; Han, X. Transformation of Fe-B@Fe into Fe-B@Ni for efficient photocatalytic hydrogen evolution. *Journal of Colloid and Interface Science*. **2020**, *578*, 273-280.
- (5) Yusuf, B.-A.; Xie, M.; Yaseen, W.; Oluigbo, C.-J.; Xie, J.-M.; Xu, Y.-G. Ni nanoparticles oriented on MoO<sub>2</sub>@BC nanosheets with an outstanding long-term stability for hydrogen evolution reaction. *Chemical Engineering Science* **2021**, *246*, 116868.
- (6) Ding, J.-T.; Ji, S.; Wang, H.; Linkov, V.; Gai, H.-J.; Liu, F.-S.; Liu, Q.-B.; Wang, R.-F. N-doped 3D porous Ni/C bifunctional electrocatalysts for alkaline water electrolysis. *ACS Sustainable Chemistry & Engineering* **2019**, *7*(4), 3974-157338.
- (7) Wang, Q.; Sun, T.; Xue, B. Nickel nanoparticles encapsulated by nitrogen-doped bamboo-shaped carbon nanotubes with a high-level doping: A boosting electrocatalyst for alkaline hydrogen evolution. *Applied Surface Science*. **2021**, *564*, 150439.
- (8) Pan, Y.; Hu, W.; Liu, D.-P.; Liu, Y.-Q.; Liu, C.-G. Carbon nanotubes decorated with nickel phosphide nanoparticles as efficient nanohybrid electrocatalysts for the hydrogen evolution reaction. *Journal of Materials Chemistry A*. **2015**, *3*(24), 13087-13094.
- (9) Xu, M.; Jia, X.-S.; Zhao, D.; Zhao, C.-S.; Ke, H.; Chen, C. Modification of Ni<sub>2</sub>P with LaPO<sub>4</sub> for efficiently photocatalytic and electrocatalytic production of green-H<sub>2</sub>. *Catalysis Today* **2022**, *402*, 310.

- (10) Gupta, S.; Patel, N.; Fernandes, R.; Kadrekar, R.; Dashora, A.; Yadav, A.-K.; Bhattacharyya, D.; Jha, S.-N.; Miotello, A.; Kothari, D.-C. Co-Ni-B nanocatalyst for efficient hydrogen evolution reaction in wide pH range. *Applied Catalysis B: Environmental*. **2016**, *192*,126-133.
